# Supplementary material for: Recent advances in the synthesis of [a]-benzo-fused BODIPY fluorophores
Source: Royal Society of Chemistry journal article supplement (doi:10.1039/c8cc06403b), 2018-01-01
Supplement: c8cc06403b1.pdf [file c8cc06403b1.pdf]

## Supporting information

### Recent advances in the synthesis of [a]-benzo-fused BODIPY fluorophores

Ludivine Jean-Gérard,\* William Vasseur, Bruno Andrioletti\*

*Univ Lyon, Université Claude Bernard Lyon 1, INSA-Lyon, CPE-Lyon, ICBMS-UMR CNRS 5246, Campus Lyon-Tech la Doua, Bât. Lederer, 43 Boulevard du 11 Novembre 1918, 69622 Villeurbanne, France.*

|                                                                                     | Solvent                         | $\lambda_{\text{abs}}$<br>(nm) | $\lambda_{\text{em}}$<br>(nm) | $\epsilon$<br>( $\times 10^5 \text{ M}^{-1} \text{ cm}^{-1}$ ) | $\phi$              | Stokes shift $\Delta_S$<br>$\Delta_S = (1/\lambda_{\text{abs}} - 1/\lambda_{\text{em}})$<br>( $\text{cm}^{-1}$ )* | Ref |
|-------------------------------------------------------------------------------------|---------------------------------|--------------------------------|-------------------------------|----------------------------------------------------------------|---------------------|-------------------------------------------------------------------------------------------------------------------|-----|
| <b>ISOINDOLE-BODIPYS</b>                                                            |                                 |                                |                               |                                                                |                     |                                                                                                                   |     |
| 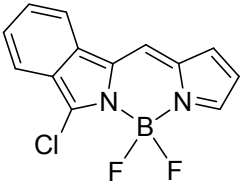   | CH <sub>2</sub> Cl <sub>2</sub> | 542                            | 562                           | 0.478                                                          | 0.62<br>(ex 520 nm) | 657                                                                                                               | 65  |
|    | CH <sub>2</sub> Cl <sub>2</sub> | 542                            | 562                           | 0.692                                                          | 0.66<br>(ex 520 nm) | 657                                                                                                               | 65  |
|   | CH <sub>2</sub> Cl <sub>2</sub> | 562                            | 572                           | 0.501                                                          | 0.62<br>(ex 520 nm) | 311                                                                                                               | 65  |
|  | CH <sub>2</sub> Cl <sub>2</sub> | 562                            | 573                           | 1.259                                                          | 0.63<br>(ex 520 nm) | 342                                                                                                               | 65  |

|                                                                                     |                                 |     |     |       |                     |      |    |
|-------------------------------------------------------------------------------------|---------------------------------|-----|-----|-------|---------------------|------|----|
| 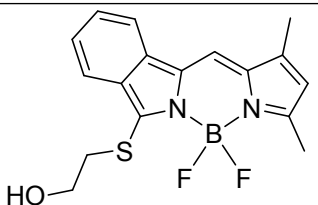   | CH <sub>2</sub> Cl <sub>2</sub> | 574 | 588 | 0.724 | 0.39<br>(ex 520 nm) | 415  | 65 |
|    | CH <sub>2</sub> Cl <sub>2</sub> | 576 | 591 | 0.407 | 0.49<br>(ex 520 nm) | 441  | 65 |
|    | CH <sub>2</sub> Cl <sub>2</sub> | 518 | 559 | 0.162 | 0.20<br>(ex 490 nm) | 1416 | 65 |
|   | CH <sub>2</sub> Cl <sub>2</sub> | 548 | 586 | 0.158 | 0.61<br>(ex 520 nm) | 1183 | 65 |
|  | CH <sub>2</sub> Cl <sub>2</sub> | 546 | 564 | 0.741 | 0.65<br>(ex 520 nm) | 585  | 65 |

|                                                                                     |                                 |     |                    |       |                     |       |     |
|-------------------------------------------------------------------------------------|---------------------------------|-----|--------------------|-------|---------------------|-------|-----|
| 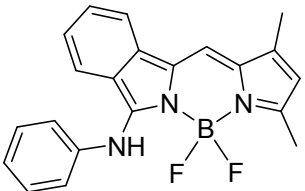   | CH <sub>2</sub> Cl <sub>2</sub> | 526 | 583                | 0.257 | 0.61<br>(ex 520 nm) | 1859  | 65  |
|    | CH <sub>2</sub> Cl <sub>2</sub> | 589 | 596<br>(ex 530 nm) | 0.149 | 0.99                | 199   | 57  |
|                                                                                     | MeOH                            | 582 | 591<br>(ex 530 nm) | 0.167 | 0.77                | 262   |     |
|                                                                                     | toluene                         | 587 | 600<br>(ex 530 nm) | 0.127 | 0.96                | 369   |     |
|   | CH <sub>2</sub> Cl <sub>2</sub> | 612 | 629                | 0.490 | 0.89<br>(ex 580 nm) | 442   | 65  |
|  | CH <sub>2</sub> Cl <sub>2</sub> | 624 | 631                | 0.95  | 0.66                | 177.8 | 74a |

|                                                                                    |                                 |     |     |       |                     |       |     |
|------------------------------------------------------------------------------------|---------------------------------|-----|-----|-------|---------------------|-------|-----|
| 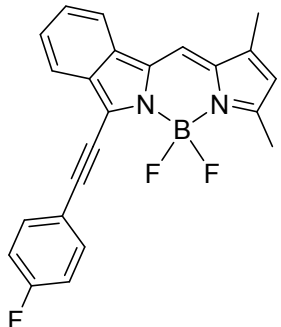  | CH <sub>2</sub> Cl <sub>2</sub> | 612 | 625 | 0.588 | 0.90<br>(ex 580 nm) | 340   | 65  |
|   | CH <sub>2</sub> Cl <sub>2</sub> | 616 | 633 | 0.339 | 0.63<br>(ex 580 nm) | 436   | 65  |
|  | CH <sub>2</sub> Cl <sub>2</sub> | 636 | 644 | 1.08  | 0.63                | 195.3 | 74a |

|                                                                                    |                                 |     |     |      |      |     |     |
|------------------------------------------------------------------------------------|---------------------------------|-----|-----|------|------|-----|-----|
| 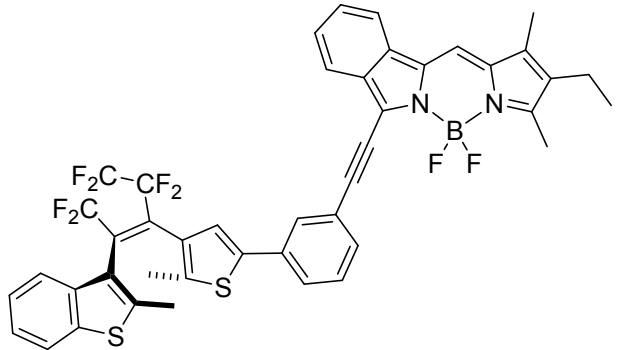  | CH <sub>2</sub> Cl <sub>2</sub> | 627 | 633 | 0.70 | 0.67 | 151 | 74b |
|  | CH <sub>2</sub> Cl <sub>2</sub> | 637 | 644 | 0.77 | 0.66 | 171 | 74b |

|  |                                 |     |     |       |                     |     |           |
|--|---------------------------------|-----|-----|-------|---------------------|-----|-----------|
|  | CH <sub>2</sub> Cl <sub>2</sub> | 626 | 633 | 1.26  | 0.66                | 288 | 74b       |
|  | CH <sub>2</sub> Cl <sub>2</sub> | 618 | 631 | 0.141 | 0.44<br>(ex 580 nm) | 333 | 65        |
|  | CH <sub>2</sub> Cl <sub>2</sub> | 612 | 628 | 0.933 | 0.80<br>(ex 580 nm) | 416 | 65        |
|  | CH <sub>2</sub> Cl <sub>2</sub> | 570 | 599 | 0.447 | 0.80                | 849 | 66,<br>68 |
|  | hexane                          | 574 | 588 | 0.776 | 0.83                | 415 | 68        |
|  | toluene                         | 577 | 600 | 0.525 | 0.81                | 664 | 68        |
|  | THF                             | 571 | 596 | 0.479 | 0.82                | 735 | 68        |
|  | MeCN                            | 561 | 594 | 0.407 | 0.80                | 990 | 68        |
|  | MeOH                            | 565 | 592 | 0.468 | 0.76                | 807 | 68        |
|  | CH <sub>2</sub> Cl <sub>2</sub> | 602 | 621 | 0.851 | 0.87                | 508 | 66,       |

|                                                                                     |                                 |     |     |       |      |     |           |
|-------------------------------------------------------------------------------------|---------------------------------|-----|-----|-------|------|-----|-----------|
|                                                                                     |                                 |     |     |       |      |     | 68        |
|                                                                                     | hexane                          | 601 | 617 | 1.175 | 0.87 | 431 | 68        |
|                                                                                     | toluene                         | 606 | 627 | 0.933 | 0.78 | 553 | 68        |
|                                                                                     | THF                             | 599 | 620 | 0.912 | 0.80 | 565 | 68        |
|                                                                                     | MeCN                            | 594 | 618 | 0.776 | 0.85 | 654 | 68        |
|                                                                                     | MeOH                            | 595 | 618 | 0.912 | 0.90 | 625 | 68        |
| 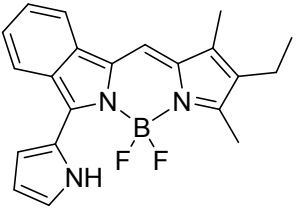   | CH <sub>2</sub> Cl <sub>2</sub> | 616 | 634 | 0.282 | 0.66 | 461 | 68        |
|                                                                                     | hexane                          | 614 | 626 | 0.363 | 0.82 | 312 | 68        |
|                                                                                     | toluene                         | 620 | 635 | 0.288 | 0.72 | 381 | 68        |
|                                                                                     | THF                             | 613 | 631 | 0.331 | 0.71 | 465 | 68        |
|                                                                                     | MeCN                            | 608 | 628 | 0.275 | 0.74 | 524 | 68        |
|                                                                                     | MeOH                            | 609 | 628 | 0.288 | 0.65 | 497 | 68        |
|    | CH <sub>2</sub> Cl <sub>2</sub> | 600 | 624 | 0.288 | 0.79 | 641 | 66,<br>68 |
|                                                                                     | hexane                          | 602 | 613 | 0.229 | 0.83 | 298 | 68        |
|                                                                                     | toluene                         | 606 | 623 | 0.355 | 0.78 | 450 | 68        |
|                                                                                     | THF                             | 599 | 621 | 0.380 | 0.81 | 591 | 68        |
|                                                                                     | MeCN                            | 592 | 620 | 0.269 | 0.80 | 763 | 68        |
|                                                                                     | MeOH                            | 595 | 616 | 0.174 | 0.83 | 573 | 68        |
|   | CH <sub>2</sub> Cl <sub>2</sub> | 608 | 629 | 0.617 | 0.89 | 549 | 68        |
|                                                                                     | hexane                          | 607 | 618 | 0.812 | 0.91 | 293 | 68        |
|                                                                                     | toluene                         | 612 | 629 | 0.759 | 0.83 | 442 | 68        |
|                                                                                     | THF                             | 607 | 625 | 0.692 | 0.82 | 474 | 68        |
|                                                                                     | MeCN                            | 600 | 623 | 0.603 | 0.84 | 615 | 68        |
|                                                                                     | MeOH                            | 602 | 620 | 0.708 | 0.83 | 482 | 68        |
|  | CH <sub>2</sub> Cl <sub>2</sub> | 609 | 631 | 0.741 | 0.61 | 573 | 66,<br>68 |
|                                                                                     | hexane                          | 610 | 626 | 1.023 | 0.85 | 419 | 68        |
|                                                                                     | toluene                         | 616 | 633 | 0.832 | 0.81 | 436 | 68        |
|                                                                                     | THF                             | 609 | 627 | 0.776 | 0.06 | 471 | 68        |
|                                                                                     | MeCN                            | 601 | 624 | 0.692 | 0.02 | 613 | 68        |



|                                                                                     |                                 |     |     |       |      |     |           |
|-------------------------------------------------------------------------------------|---------------------------------|-----|-----|-------|------|-----|-----------|
|                                                                                     | MeOH                            | 603 | 622 | 0.759 | 0.03 | 507 | 68        |
| 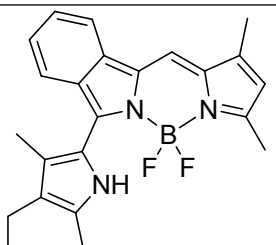   | CH <sub>2</sub> Cl <sub>2</sub> | 616 | 640 | 0.891 | 0.86 | 609 | 68        |
|                                                                                     | hexane                          | 616 | 630 | 1.380 | 0.99 | 361 | 68        |
|                                                                                     | toluene                         | 623 | 642 | 1.047 | 0.93 | 475 | 68        |
|                                                                                     | THF                             | 615 | 635 | 1.023 | 0.07 | 512 | 68        |
|                                                                                     | MeCN                            | 607 | 632 | 0.851 | 0.02 | 652 | 68        |
|                                                                                     | MeOH                            | 610 | 631 | 0.955 | 0.04 | 546 | 68        |
|    | CH <sub>2</sub> Cl <sub>2</sub> | 629 | 650 | 0.813 | 0.73 | 514 | 66,<br>68 |
|                                                                                     | hexane                          | 629 | 641 | 1.072 | 0.86 | 298 | 68        |
|                                                                                     | toluene                         | 636 | 651 | 0.871 | 0.75 | 362 | 68        |
|                                                                                     | THF                             | 629 | 644 | 0.813 | 0.09 | 370 | 68        |
|                                                                                     | MeCN                            | 620 | 643 | 0.661 | 0.03 | 577 | 68        |
|                                                                                     | MeOH                            | 623 | 642 | 0.724 | 0.04 | 475 | 68        |
|    | CH <sub>2</sub> Cl <sub>2</sub> | 585 | 611 | 0.676 | 0.99 | 727 | 68        |
|                                                                                     | hexane                          | 586 | 605 | 0.794 | 0.96 | 536 | 68        |
|                                                                                     | toluene                         | 591 | 613 | 0.708 | 0.94 | 607 | 68        |
|                                                                                     | THF                             | 585 | 608 | 0.724 | 0.96 | 647 | 68        |
|                                                                                     | MeCN                            | 580 | 606 | 0.661 | 0.97 | 740 | 68        |
|                                                                                     | MeOH                            | 581 | 605 | 0.692 | 0.98 | 683 | 68        |
|  | CH <sub>2</sub> Cl <sub>2</sub> | 584 | 611 | 0.525 | 0.99 | 757 | 68        |
|                                                                                     | hexane                          | 583 | 605 | 0.575 | 0.99 | 624 | 68        |
|                                                                                     | toluene                         | 590 | 613 | 0.513 | 0.99 | 636 | 68        |
|                                                                                     | THF                             | 584 | 610 | 0.513 | 0.98 | 730 | 68        |
|                                                                                     | MeCN                            | 577 | 606 | 0.501 | 0.99 | 829 | 68        |
|                                                                                     | MeOH                            | 579 | 607 | 0.525 | 0.96 | 797 | 68        |
|  | CH <sub>2</sub> Cl <sub>2</sub> | 608 | 631 | 0.794 | 0.85 | 600 | 68        |
|                                                                                     | hexane                          | 610 | 626 | 1.000 | 0.87 | 419 | 68        |
|                                                                                     | toluene                         | 615 | 636 | 0.891 | 0.79 | 537 | 68        |
|                                                                                     | THF                             | 604 | 628 | 0.759 | 0.16 | 633 | 68        |

|                                                                                     |                                 |     |     |       |      |      |           |
|-------------------------------------------------------------------------------------|---------------------------------|-----|-----|-------|------|------|-----------|
|                                                                                     | MeCN                            | 596 | 623 | 0.724 | 0.03 | 727  | 68        |
|                                                                                     | MeOH                            | 598 | 624 | 0.776 | 0.02 | 697  | 68        |
| 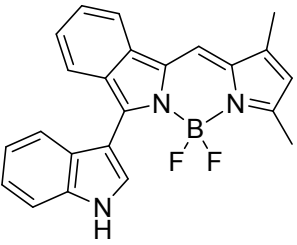   | CH <sub>2</sub> Cl <sub>2</sub> | 581 | 606 | 0.776 | 0.98 | 710  | 68        |
|                                                                                     | hexane                          | 580 | 598 | 0.871 | 0.99 | 519  | 68        |
|                                                                                     | toluene                         | 587 | 608 | 0.851 | 0.96 | 588  | 68        |
|                                                                                     | THF                             | 583 | 606 | 0.794 | 0.97 | 651  | 68        |
|                                                                                     | MeCN                            | 575 | 602 | 0.708 | 0.96 | 780  | 68        |
|                                                                                     | MeOH                            | 579 | 603 | 0.776 | 0.96 | 687  | 68        |
|    | CH <sub>2</sub> Cl <sub>2</sub> | 611 | 648 | 0.977 | 0.08 | 935  | 66,<br>68 |
|                                                                                     | hexane                          | 623 | 644 | 0.427 | 0.14 | 523  | 68        |
|                                                                                     | toluene                         | 625 | 656 | 0.741 | 0.14 | 756  | 68        |
|                                                                                     | THF                             | 608 | 646 | 0.724 | 0.04 | 967  | 68        |
|                                                                                     | MeCN                            | 591 | 637 | 0.468 | 0.04 | 1222 | 68        |
|                                                                                     | MeOH                            | 598 | 643 | 0.537 | 0.03 | 1170 | 68        |
|   | CH <sub>2</sub> Cl <sub>2</sub> | 680 | 705 | 0.871 | 0.75 | 521  | 66,<br>68 |
|                                                                                     | hexane                          | 679 | 693 | 0.457 | 0.73 | 298  | 68        |
|                                                                                     | toluene                         | 687 | 707 | 0.589 | 0.69 | 412  | 68        |
|                                                                                     | THF                             | 679 | 703 | 0.513 | 0.34 | 503  | 68        |
|                                                                                     | MeCN                            | 670 | 699 | 0.427 | 0.30 | 619  | 68        |
|                                                                                     | MeOH                            | 671 | 697 | 0.251 | 0.08 | 556  | 68        |
|  | CH <sub>2</sub> Cl <sub>2</sub> | 725 | 770 | 0.631 | 0.13 | 806  | 68        |
|                                                                                     | hexane                          | 719 | 740 | 0.891 | 0.27 | 395  | 68        |

|                                                                                     |                                 |     |     |       |      |      |        |
|-------------------------------------------------------------------------------------|---------------------------------|-----|-----|-------|------|------|--------|
|                                                                                     | toluene                         | 730 | 760 | 0.724 | 0.16 | 541  | 68     |
|                                                                                     | THF                             | 720 | 764 | 0.708 | 0.11 | 800  | 68     |
|                                                                                     | MeCN                            | 713 | 805 | 0.589 | 0.05 | 1603 | 68     |
|                                                                                     | MeOH                            | 712 | 770 | 0.63  | 0.05 | 1058 | 68     |
| 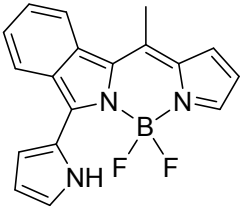   | CH <sub>2</sub> Cl <sub>2</sub> | 563 | 592 | 0.759 | 0.91 | 870  | 66, 68 |
|                                                                                     | hexane                          | 566 | 582 | 1.047 | 0.65 | 486  | 68     |
|                                                                                     | toluene                         | 570 | 594 | 0.646 | 0.72 | 709  | 68     |
|                                                                                     | THF                             | 564 | 589 | 0.708 | 0.54 | 753  | 68     |
|                                                                                     | MeCN                            | 555 | 586 | 0.513 | 0.64 | 953  | 68     |
|                                                                                     | MeOH                            | 558 | 585 | 0.355 | 0.69 | 827  | 68     |
|    | CH <sub>2</sub> Cl <sub>2</sub> | 599 | 625 | 0.912 | 0.80 | 694  | 66, 68 |
|                                                                                     | hexane                          | 601 | 619 | 1.862 | 0.86 | 484  | 68     |
|                                                                                     | toluene                         | 605 | 635 | 1.122 | 0.82 | 781  | 68     |
|                                                                                     | THF                             | 599 | 627 | 1.862 | 0.19 | 746  | 68     |
|                                                                                     | MeCN                            | 590 | 623 | 0.977 | 0.05 | 898  | 68     |
|                                                                                     | MeOH                            | 593 | 622 | 0.891 | 0.07 | 786  | 68     |
|   | CH <sub>2</sub> Cl <sub>2</sub> | 605 | 629 | 0.708 | 0.92 | 631  | 68     |
|                                                                                     | hexane                          | 604 | 622 | 0.813 | 0.93 | 479  | 68     |
|                                                                                     | toluene                         | 609 | 630 | 0.372 | 0.81 | 547  | 68     |
|                                                                                     | THF                             | 604 | 627 | 0.295 | 0.88 | 607  | 68     |
|                                                                                     | MeCN                            | 597 | 623 | 0.339 | 0.88 | 599  | 68     |
|                                                                                     | MeOH                            | 599 | 622 | 0.251 | 0.97 | 617  | 68     |
|  | CH <sub>2</sub> Cl <sub>2</sub> | 619 | 645 | 1.175 | 0.72 | 651  | 66, 68 |
|                                                                                     | hexane                          | 620 | 636 | 1.380 | 0.93 | 406  | 68     |
|                                                                                     | toluene                         | 625 | 646 | 1.122 | 0.71 | 520  | 68     |
|                                                                                     | THF                             | 618 | 656 | 1.148 | 0.27 | 937  | 68     |
|                                                                                     | MeCN                            | 610 | 652 | 0.933 | 0.21 | 1056 | 68     |

|                                                                                     |                                 |     |     |       |                    |      |        |
|-------------------------------------------------------------------------------------|---------------------------------|-----|-----|-------|--------------------|------|--------|
|                                                                                     | MeOH                            | 613 | 650 | 1.023 | 0.21               | 929  | 68     |
| 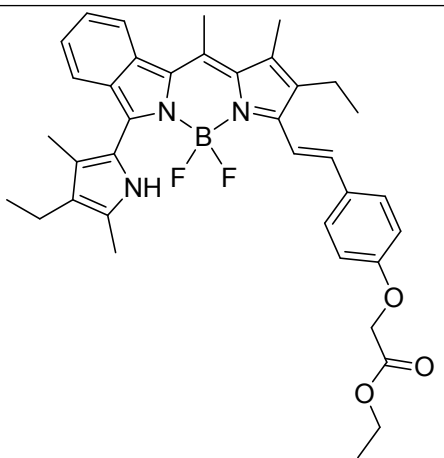   | CH <sub>2</sub> Cl <sub>2</sub> | 675 | 714 | 0.575 | 0.68               | 809  | 66, 68 |
|                                                                                     | hexane                          | 677 | 698 | 0.214 | 0.74               | 444  | 68     |
|                                                                                     | toluene                         | 682 | 709 | 0.525 | 0.71               | 558  | 68     |
|                                                                                     | THF                             | 675 | 709 | 0.490 | 0.28               | 710  | 68     |
|                                                                                     | MeCN                            | 664 | 707 | 0.447 | 0.09               | 916  | 68     |
|                                                                                     | MeOH                            | 666 | 711 | 0.389 | 0.20               | 950  | 68     |
|   | CH <sub>2</sub> Cl <sub>2</sub> | 552 | 573 | 0.724 | 1.0<br>(ex 513 nm) |      | 29     |
|  | CH <sub>2</sub> Cl <sub>2</sub> | 585 | 631 | 0.427 | 0.003              | 1246 | 66, 68 |
|                                                                                     | hexane                          | 587 | 630 | 0.151 | 0.009              | 1163 | 68     |
|                                                                                     | toluene                         | 592 | 637 | 0.437 | 0.004              | 1193 | 68     |
|                                                                                     | THF                             | 586 | 625 | 0.513 | 0.003              | 1065 | 68     |
|                                                                                     | MeCN                            | 577 | 617 | 0.661 | 0.003              | 1124 | 68     |

|                                                                                    |                                 |     |     |       |       |      |        |
|------------------------------------------------------------------------------------|---------------------------------|-----|-----|-------|-------|------|--------|
|                                                                                    | MeOH                            | 580 | 624 | 0.427 | 0.005 | 1216 | 68     |
| 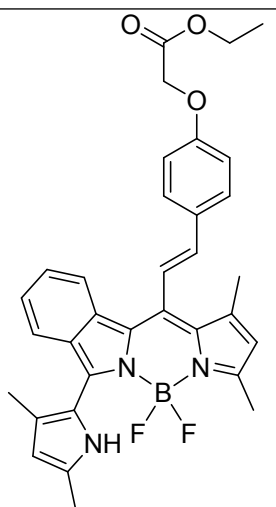  | CH <sub>2</sub> Cl <sub>2</sub> | 608 | 687 | 0.083 | 0.01  | 1891 | 66, 68 |
|                                                                                    | hexane                          | 608 | 679 | 0.741 | 0.013 | 1720 | 68     |
|                                                                                    | toluene                         | 614 | 690 | 0.813 | 0.012 | 1794 | 68     |
|                                                                                    | THF                             | 608 | 684 | 0.676 | 0.012 | 1827 | 68     |
|                                                                                    | MeCN                            | 602 | 681 | 0.692 | 0.005 | 1927 | 68     |
|                                                                                    | MeOH                            | 603 | 680 | 0.661 | 0.002 | 1878 | 68     |
|  | CH <sub>2</sub> Cl <sub>2</sub> | 676 | 733 | 1.445 | 0.012 | 989  | 66     |
|                                                                                    |                                 |     |     |       |       | 1150 | 68     |
|                                                                                    | hexane                          | 674 | 731 | 1.096 | 0.04  | 1157 | 68     |
|                                                                                    | toluene                         | 683 | 735 | 1.023 | 0.009 | 1036 | 68     |
|                                                                                    | THF                             | 676 | 730 | 1.445 | 0.005 | 1094 | 68     |
|                                                                                    | MeCN                            | 667 | 727 | 1.047 | 0.009 | 1237 | 68     |

|                                                                                    |                                 |                  |     |       |       |      |    |
|------------------------------------------------------------------------------------|---------------------------------|------------------|-----|-------|-------|------|----|
|                                                                                    | MeOH                            | 668              | 726 | 1.148 | 0.002 | 1196 | 68 |
| 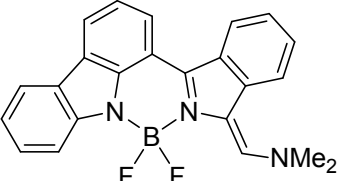  | CH <sub>2</sub> Cl <sub>2</sub> | 292,<br>390, 482 | 528 |       | low   | 1810 | 69 |
|   | CH <sub>2</sub> Cl <sub>2</sub> | 292,<br>398, 493 | 561 |       | low   | 2460 | 69 |
|   | CH <sub>2</sub> Cl <sub>2</sub> | 304,<br>409, 508 | 650 |       | low   | 4300 | 69 |
|  | CH <sub>2</sub> Cl <sub>2</sub> | 287,<br>401, 495 | 559 |       | low   | 2310 | 69 |

|                                                                                    |                                 |                          |     |  |     |      |    |
|------------------------------------------------------------------------------------|---------------------------------|--------------------------|-----|--|-----|------|----|
| 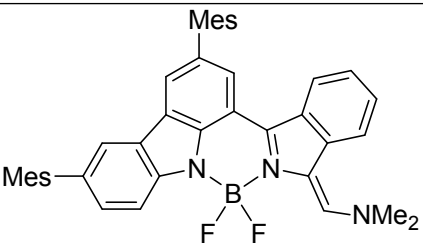  | CH <sub>2</sub> Cl <sub>2</sub> | 293,<br>398, 492         | 555 |  | low | 2310 | 69 |
|   | CH <sub>2</sub> Cl <sub>2</sub> | 289,<br>400, 492         | 571 |  | low | 2810 | 69 |
|   | CH <sub>2</sub> Cl <sub>2</sub> | 291,<br>375,<br>448, 475 | 508 |  | low | 1370 | 69 |
|  | CH <sub>2</sub> Cl <sub>2</sub> | 278,<br>296,<br>381, 472 | 519 |  | low | 1920 | 69 |
| <b>DIISOINDOLE-BODIPYs</b>                                                         |                                 |                          |     |  |     |      |    |

|                                                                                     |                   |                                                |     |                                      |                |             |    |
|-------------------------------------------------------------------------------------|-------------------|------------------------------------------------|-----|--------------------------------------|----------------|-------------|----|
| 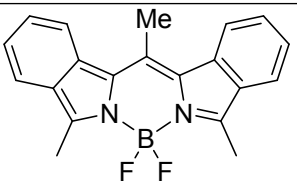   |                   | 558, 603<br>(CH <sub>2</sub> Cl <sub>2</sub> ) | 609 | 0.331, 1.55<br>(CHCl <sub>3</sub> )  | 0.28 (EtOH)    | 1501*, 163* | 24 |
|    |                   | 557, 601<br>(CH <sub>2</sub> Cl <sub>2</sub> ) | 608 | 0.316, 1.445<br>(CHCl <sub>3</sub> ) | 0.33<br>(EtOH) | 1506*, 192* | 24 |
|    |                   | 557, 602<br>(CH <sub>2</sub> Cl <sub>2</sub> ) | 608 | 0.251, 1.32<br>(CHCl <sub>3</sub> )  | 0.36<br>(EtOH) | 1506*, 164* | 24 |
|    | hexane            | 599                                            | 605 |                                      | 0.91           | 166*        | 26 |
|                                                                                     | Bu <sub>2</sub> O | 600                                            | 607 |                                      | 0.97           | 192*        |    |
|                                                                                     | Et <sub>2</sub> O | 598                                            | 605 |                                      | 0.98           | 193*        |    |
|                                                                                     | ethyl acetate     | 598                                            | 606 |                                      | 0.93           | 221*        |    |
|                                                                                     | THF               | 600                                            | 609 |                                      | 0.99           | 246*        |    |
|                                                                                     | cyclohexanone     | 602                                            | 611 |                                      | 0.93           | 245*        |    |
|                                                                                     | acetone           | 598                                            | 606 |                                      | 0.87           | 221*        |    |
|                                                                                     | propionitrile     | 598                                            | 607 |                                      | 0.84           | 248*        |    |
|                                                                                     | MeCN              | 597                                            | 606 |                                      | 0.87           | 249*        |    |
|                                                                                     | MeOH              | 597                                            | 606 |                                      | 0.83           | 249*        |    |
|  | hexane            | 599                                            | 605 |                                      | 0.90           | 166*        | 26 |
|                                                                                     | Bu <sub>2</sub> O | 600                                            | 607 |                                      | 0.89           | 192*        |    |
|                                                                                     | Et <sub>2</sub> O | 598                                            | 604 |                                      | 0.87           | 166*        |    |
|                                                                                     | ethyl acetate     | 598                                            | 605 |                                      | 0.85           | 193*        |    |
|                                                                                     | THF               | 601                                            | 608 |                                      | 0.88           | 192*        |    |
|                                                                                     | cyclohex          | 602                                            | 610 |                                      | 0.51           | 218*        |    |



|                                                                                    |                   |                        |     |  |       |      |
|------------------------------------------------------------------------------------|-------------------|------------------------|-----|--|-------|------|
|                                                                                    | anone             |                        |     |  |       |      |
|                                                                                    | acetone           | 598                    | 606 |  | 0.14  | 221* |
|                                                                                    | propioni<br>trile | 598                    | 606 |  | 0.091 | 221* |
|                                                                                    | MeCN              | 597                    | 605 |  | 0.022 | 221* |
|                                                                                    | MeOH              | 597                    | 606 |  | 0.13  | 249* |
| 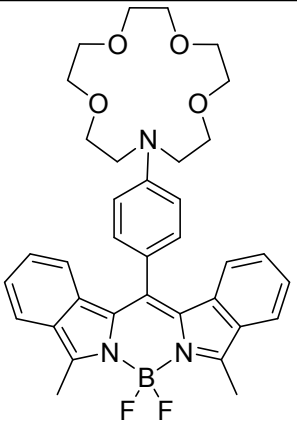  | hexane            | 599                    | 605 |  | 0.74  | 166* |
|                                                                                    | Bu <sub>2</sub> O | 601                    | 607 |  | 0.84  | 164* |
|                                                                                    | Et <sub>2</sub> O | 598                    | 605 |  | 0.92  | 193* |
|                                                                                    | ethyl<br>acetate  | 598                    | 606 |  | 0.92  | 221* |
|                                                                                    | THF               | 601                    | 608 |  | 0.95  | 192* |
|                                                                                    | cyclohex<br>anone | 603                    | 610 |  | 0.74  | 190* |
|                                                                                    | acetone           | 598                    | 606 |  | 0.44  | 221* |
|                                                                                    | propioni<br>trile | 599                    | 606 |  | 0.26  | 193* |
|                                                                                    | MeCN              | 598                    | 606 |  | 0.093 | 221* |
|                                                                                    | MeOH              | 598                    | 605 |  | 0.48  | 193* |
|  | hexane            | n.d.<br>(low<br>solu.) | 605 |  | 0.78  |      |
|                                                                                    | Bu <sub>2</sub> O | 601                    | 608 |  | 0.89  | 192* |
|                                                                                    | Et <sub>2</sub> O | 598                    | 606 |  | 0.94  | 221* |
|                                                                                    | ethyl<br>acetate  | 599                    | 606 |  | 0.92  | 193* |
|                                                                                    | THF               | 601                    | 609 |  | 0.92  | 219* |
|                                                                                    | cyclohex<br>anone | 603                    | 611 |  | 0.88  | 217* |
|                                                                                    | acetone           | 599                    | 607 |  | 0.96  | 220* |
|                                                                                    | propioni<br>trile | 599                    | 608 |  | 0.96  | 247* |
|                                                                                    | MeCN              | 598                    | 607 |  | 0.86  | 248* |
|                                                                                    | MeOH              | 598                    | 606 |  | 0.80  | 221* |

|                                                                                     |                                 |                                                |     |                                     |                     |      |     |
|-------------------------------------------------------------------------------------|---------------------------------|------------------------------------------------|-----|-------------------------------------|---------------------|------|-----|
| 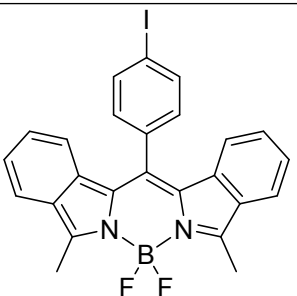   |                                 | 561, 606<br>(CH <sub>2</sub> Cl <sub>2</sub> ) | 614 | 0.263, 1.35<br>(CHCl <sub>3</sub> ) | 0.26<br>(EtOH)      | 215  | 24  |
|    | CH <sub>2</sub> Cl <sub>2</sub> | 560, 605                                       | 624 | 0.257, 1.35                         | 0.08<br>(ex 562 nm) | 503* | 33  |
|                                                                                     | toluene                         | 623                                            |     | 6.9x10 <sup>-5</sup>                |                     |      |     |
|                                                                                     | MeCN                            |                                                | 617 |                                     | 0.08<br>(ex 562 nm) |      |     |
|   | CH <sub>2</sub> Cl <sub>2</sub> | 560, 605                                       | 622 | 0.264, 1.318                        | 0.90<br>(ex 562 nm) | 452* | 33  |
|                                                                                     | toluene                         | 626                                            |     | 7.9x10 <sup>-5</sup>                |                     |      |     |
|                                                                                     | MeCN                            |                                                | 615 |                                     | 0.83<br>(ex 562 nm) |      |     |
|  | CH <sub>2</sub> Cl <sub>2</sub> | 571                                            | 597 | nd<br>(not stable)                  | nd<br>(not stable)  | 763* | 34a |

|                                                                                     |                                 |     |                    |                     |      |      |           |
|-------------------------------------------------------------------------------------|---------------------------------|-----|--------------------|---------------------|------|------|-----------|
| 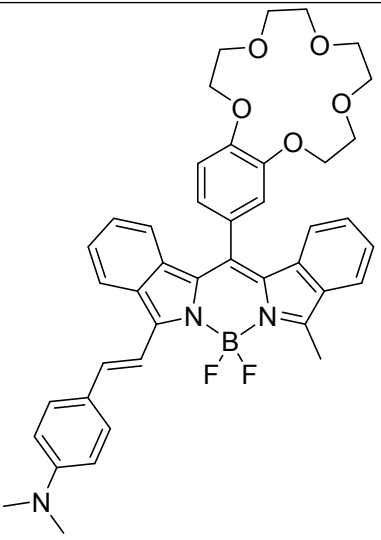   | MeOH                            | 691 | 732                | 0.71                | 0.20 | 850  | 28        |
|                                                                                     | MeCN                            | 693 | 741                | 0.692               | 0.24 | 980  |           |
|                                                                                     | cyclohexanone                   | 703 | 739                | 0.776               | 0.28 | 740  |           |
|                                                                                     | THF                             | 697 | 726                | 0.794               | 0.30 | 620  |           |
|                                                                                     | Et <sub>2</sub> O               | 688 | 709                | 0.933               | 0.39 | 480  |           |
|                                                                                     | Bu <sub>2</sub> O               | 690 | 709                | 0.912               | 0.45 | 410  |           |
|                                                                                     | hexane                          | 685 | 697                | n.d.<br>(low solub) | 0.35 | 250  |           |
|    | CH <sub>2</sub> Cl <sub>2</sub> | 642 | 664                | 0.20                | 0.38 | 516  | 57        |
|                                                                                     | MeOH                            | 635 | 651<br>(ex 600 nm) | 0.03                | 0.11 | 387  |           |
|                                                                                     | toluene                         | 644 | 665<br>(ex 600 nm) | 0.13                | 0.91 | 490  |           |
|  | hexane                          | 637 | 654                |                     | 0.44 |      | 15,<br>57 |
|                                                                                     | Bu <sub>2</sub> O               | 637 | 657                |                     | 0.45 |      |           |
|                                                                                     | Et <sub>2</sub> O               | 633 | 655                |                     | 0.43 | 531* |           |
|                                                                                     | ethyl acetate                   | 632 | 657                |                     | 0.39 | 602* |           |
|                                                                                     | THF                             | 635 | 660                |                     | 0.42 | 597* |           |
|                                                                                     | cyclohexanone                   | 635 | 663                |                     | 0.42 | 665* |           |
|                                                                                     | acetone                         | 631 | 659                |                     | 0.43 | 673* |           |
|                                                                                     | propionitrile                   | 633 | 661                |                     | 0.36 | 669* |           |

|                                                                                     |                                 |     |                          |       |      |      |    |
|-------------------------------------------------------------------------------------|---------------------------------|-----|--------------------------|-------|------|------|----|
|                                                                                     | MeCN                            | 633 | 662                      |       | 0.43 | 692* |    |
|                                                                                     | MeOH                            | 634 | 664                      |       | 0.34 | 713* |    |
|                                                                                     | CH <sub>2</sub> Cl <sub>2</sub> | 643 | 665<br>(ex<br>600<br>nm) | 0.244 | 0.38 | 515  |    |
|                                                                                     | toluene                         | 643 | 663<br>(ex<br>600<br>nm) | 0.100 | 0.83 | 469  |    |
| 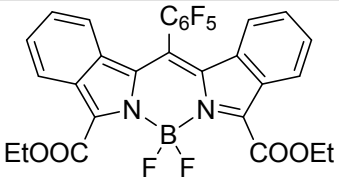   | CH <sub>2</sub> Cl <sub>2</sub> | 658 | 680<br>(ex<br>600<br>nm) | 0.192 | 0.31 | 492  | 57 |
|                                                                                     | MeOH                            | 652 | nd                       | nd    | nd   | nd   |    |
|                                                                                     | toluene                         | 658 | 679<br>(ex<br>600<br>nm) | 0.072 | 0.6  | 470  |    |
|   | CH <sub>2</sub> Cl <sub>2</sub> | 643 | 664<br>(ex<br>600<br>nm) | 0.153 | 0.43 | 492  | 57 |
|                                                                                     | MeOH                            | 635 | 655<br>(ex<br>600<br>nm) | 0.186 | 0.38 | 481  |    |
|                                                                                     | toluene                         | 643 | 662<br>(ex<br>600<br>nm) | 0.082 | 0.81 | 446  |    |
|  | CH <sub>2</sub> Cl <sub>2</sub> | 644 | 666<br>(ex<br>600<br>nm) | 0.263 | 0.43 | 513  | 57 |

|                                                                                     |                                 |     |                          |       |       |      |           |
|-------------------------------------------------------------------------------------|---------------------------------|-----|--------------------------|-------|-------|------|-----------|
|                                                                                     | MeOH                            | 636 | 654<br>(ex<br>600<br>nm) | 0.088 | 0.36  | 433  |           |
|                                                                                     | toluene                         | 643 | 663<br>(ex<br>600<br>nm) | 0.251 | 0.82  | 469  |           |
| 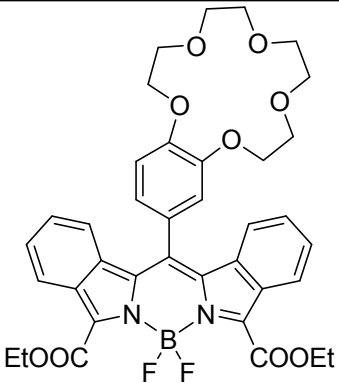   | hexane                          | 638 | 655                      |       | 0.35  | 407* | 15        |
|                                                                                     | Bu <sub>2</sub> O               | 637 | 658                      |       | 0.40  | 501* |           |
|                                                                                     | Et <sub>2</sub> O               | 634 | 656                      |       | 0.45  | 529* |           |
|                                                                                     | ethyl acetate                   | 634 | 658                      |       | 0.37  | 575* |           |
|                                                                                     | THF                             | 635 | 661                      |       | 0.41  | 619* |           |
|                                                                                     | cyclohexanone                   | 635 | 663                      |       | 0.13  | 665* |           |
|                                                                                     | acetone                         | 631 | 660                      |       | 0.039 | 696* |           |
|                                                                                     | propionitrile                   | 633 | 662                      |       | 0.016 | 692* |           |
|                                                                                     | MeCN                            | 634 | 662                      |       | 0.018 | 667* |           |
|                                                                                     | MeOH                            | 636 | 661                      |       | 0.046 | 595* |           |
|   | THF                             | 640 | 662<br>(ex<br>600<br>nm) | 1.07  | 0.57  | 519  | 55,<br>53 |
|                                                                                     | MeOH                            | 634 | 658                      | 1.08  | 0.92  | 575* | 34a       |
|                                                                                     | CHCl <sub>3</sub>               | 644 | 667                      | 1.025 | 0.73  | 535* |           |
|                                                                                     | MeCN                            | 633 | 657                      | 1.068 | 1.00  | 577* |           |
|                                                                                     | dioxane                         | 639 | 660                      | 1.127 | 0.84  | 498* |           |
|                                                                                     | toluene                         | 645 | 663                      | 1.085 | 0.61  | 421* |           |
|                                                                                     | hexane                          | 638 | 657                      | 1.158 | 0.89  | 453* |           |
|                                                                                     | CH <sub>2</sub> Cl <sub>2</sub> | 634 | 658                      | 1.084 | 0.88  | 575  | 39        |
| CH <sub>2</sub> Cl <sub>2</sub>                                                     | 641                             | 663 | 1.037                    | 0.65  | 518   | 48   |           |
|  | MeOH                            | 646 | 673                      | 1.05  | 0.71  | 621* | 34a       |
|                                                                                     | MeOH                            | 648 | 680                      | 0.549 | 0.78  | 726  | 71        |

|                                                                                     |                                 |     |     |       |      |      |     |
|-------------------------------------------------------------------------------------|---------------------------------|-----|-----|-------|------|------|-----|
|                                                                                     | MeCN                            | 645 | 680 | 0.603 | 0.74 | 798  | 71  |
|                                                                                     | THF                             | 653 | 684 | 0.832 | 0.73 | 694  | 71  |
|                                                                                     | CH <sub>2</sub> Cl <sub>2</sub> | 654 | 687 | 0.871 | 0.76 | 734  | 71  |
|                                                                                     | toluene                         | 658 | 690 | 0.692 | 0.70 | 705  | 71  |
| 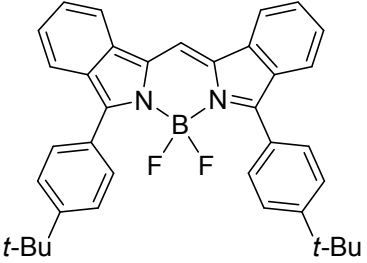   | MeCN                            | 640 | 671 | 0.724 | 0.85 | 722  | 71  |
|                                                                                     | MeOH                            | 642 | 673 | 0.692 | 0.99 | 717  | 71  |
|                                                                                     | THF                             | 648 | 677 | 0.871 | 0.82 | 661  | 71  |
|                                                                                     | CH <sub>2</sub> Cl <sub>2</sub> | 648 | 679 | 0.933 | 0.91 | 704  | 71  |
|                                                                                     | toluene                         | 653 | 681 | 1.096 | 0.76 | 630  | 71  |
|    | MeOH                            | 659 | 698 | nd    | nd   | 848* | 34a |
|   | MeCN                            | 634 | 663 | 0.575 | 0.93 | 690  | 71  |
|                                                                                     | MeOH                            | 635 | 664 | 0.595 | 0.93 | 688  | 71  |
|                                                                                     | THF                             | 641 | 669 | 0.692 | 0.82 | 653  | 71  |
|                                                                                     | CH <sub>2</sub> Cl <sub>2</sub> | 643 | 671 | 0.741 | 0.92 | 649  | 71  |
|                                                                                     | toluene                         | 646 | 674 | 0.871 | 0.78 | 643  | 71  |
|  | MeCN                            | 635 | 669 | 0.631 | 0.90 | 800  | 71  |
|                                                                                     | MeOH                            | 637 | 671 | 0.724 | 0.96 | 795  | 71  |
|                                                                                     | THF                             | 643 | 675 | 0.708 | 0.87 | 737  | 71  |
|                                                                                     | CH <sub>2</sub> Cl <sub>2</sub> | 648 | 677 | 0.955 | 0.87 | 757  | 71  |
|                                                                                     | toluene                         | 648 | 679 | 1.023 | 0.75 | 704  | 71  |

|                                                                                    |                   |     |                          |      |      |      |     |
|------------------------------------------------------------------------------------|-------------------|-----|--------------------------|------|------|------|-----|
| 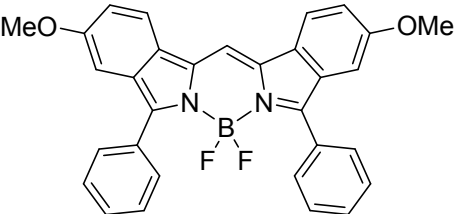  | MeOH              | 663 | 690                      | 0.96 | 0.57 | 590* | 34a |
|   | CHCl <sub>3</sub> | 625 | 652                      | nd   | nd   | 662* | 34a |
|   | CHCl <sub>3</sub> | 653 | 683                      | 1.55 | 0.56 | 672* | 45  |
|  | THF               | 677 | 701<br>(ex<br>654<br>nm) | 1.23 | 0.33 | 506  | 53  |

|                                                                                     |                   |          |     |             |      |      |    |
|-------------------------------------------------------------------------------------|-------------------|----------|-----|-------------|------|------|----|
| 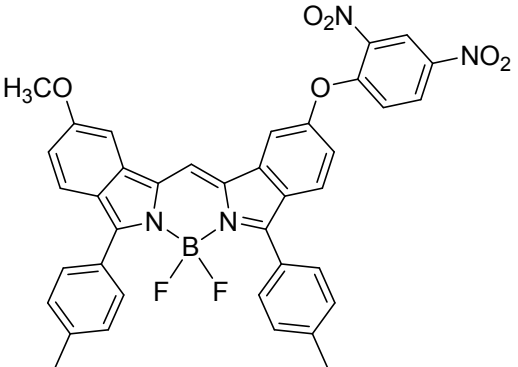   | PBS/<br>DMSO      | 650      | 655 |             |      | 117* | 54 |
|    | PBS/<br>DMSO      | 650      | 663 |             |      | 302* | 54 |
|   | CHCl <sub>3</sub> | 638      | 673 | 2.09        | 0.62 | 815* | 45 |
|  | THF               | 360, 631 |     | 0.212, 1.11 |      |      | 51 |



|                                                                                                                                                                                      |                                 |     |     |       |      |      |     |
|--------------------------------------------------------------------------------------------------------------------------------------------------------------------------------------|---------------------------------|-----|-----|-------|------|------|-----|
| 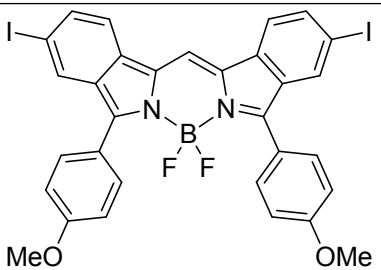 <p>Chemical structure of a porphyrin derivative with two iodine atoms and two methoxy groups.</p>  | CHCl <sub>3</sub>               | 667 | 702 | 2.05  | 0.72 | 747* | 45  |
|  <p>Chemical structure of a porphyrin derivative with two bromine atoms and two methoxy groups.</p> | CH <sub>2</sub> Cl <sub>2</sub> | 651 | 679 | 0.86  | 0.75 | 633  | 62  |
|  <p>Chemical structure of a porphyrin derivative with four methoxy groups.</p>                     | MeOH                            | 673 | 704 | 1.19  | 0.51 | 654* | 34a |
|                                                                                                                                                                                      | CH <sub>2</sub> Cl <sub>2</sub> | 673 | 704 | 1.186 | 0.49 | 654  | 39  |
|                                                                                                                                                                                      | CH <sub>2</sub> Cl <sub>2</sub> | 679 | 708 | 0.898 | 0.49 | 603  | 48  |
|                                                                                                                                                                                      | THF                             | 654 |     | 0.867 |      |      | 32  |

|                                                                                    |                                 |     |     |      |      |     |    |
|------------------------------------------------------------------------------------|---------------------------------|-----|-----|------|------|-----|----|
| 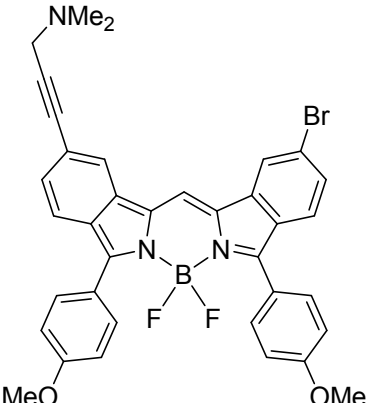  | CH <sub>2</sub> Cl <sub>2</sub> | 662 | 687 | 1.25 | 0.54 | 549 | 62 |
|  | CH <sub>2</sub> Cl <sub>2</sub> | 673 | 698 | 1.17 | 0.49 | 532 | 62 |

|                                                                                     |                                 |                  |     |                       |      |     |    |
|-------------------------------------------------------------------------------------|---------------------------------|------------------|-----|-----------------------|------|-----|----|
| 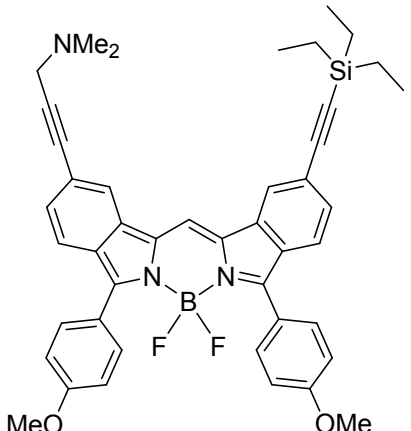   | CH <sub>2</sub> Cl <sub>2</sub> | 676              | 699 | 1.24                  | 0.50 | 486 | 62 |
|   | CH <sub>2</sub> Cl <sub>2</sub> | 678              | 703 | 1.19                  | 0.52 | 524 | 62 |
|  | THF                             | 371,<br>457, 647 |     | 0.500, 0.192,<br>1.57 |      |     | 51 |

|                                                                                     |                                 |               |     |                    |      |     |    |
|-------------------------------------------------------------------------------------|---------------------------------|---------------|-----|--------------------|------|-----|----|
| 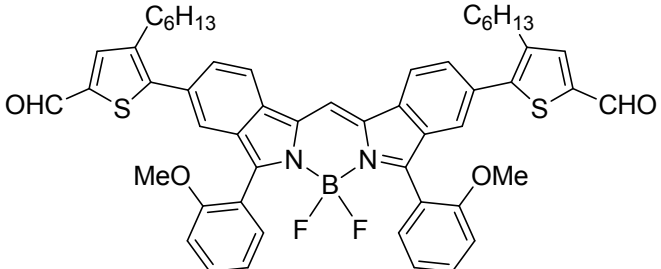   | THF                             | 371, 644      |     | 0.332, 1.39        |      |     | 51 |
|    | THF                             | 369, 406, 660 |     | 0.478, 0.390, 1.09 |      |     | 51 |
|   | toluene                         | 690           | 725 | 0.88               | 0.36 | 699 | 62 |
|                                                                                     | CH <sub>2</sub> Cl <sub>2</sub> | 687           | 728 | 0.86               | 0.34 | 820 |    |
|                                                                                     | acetone                         | 682           | 725 | 0.84               | 0.27 | 869 |    |
|                                                                                     | acetone + H <sup>+</sup>        | 664           | 692 | 0.79               | 0.40 | 609 |    |
|  | toluene                         | 716           | 762 | 0.95               | 0.28 | 843 | 62 |

|                                                                                     |                                 |     |     |      |      |      |    |
|-------------------------------------------------------------------------------------|---------------------------------|-----|-----|------|------|------|----|
|                                                                                     | CH <sub>2</sub> Cl <sub>2</sub> | 717 | 769 | 0.70 | 0.21 | 943  |    |
|                                                                                     | acetone                         | 713 | 773 | 0.86 | 0.18 | 1088 |    |
|                                                                                     | acetone + H <sup>+</sup>        | 687 | 711 | 0.76 | 0.30 | 491  |    |
| 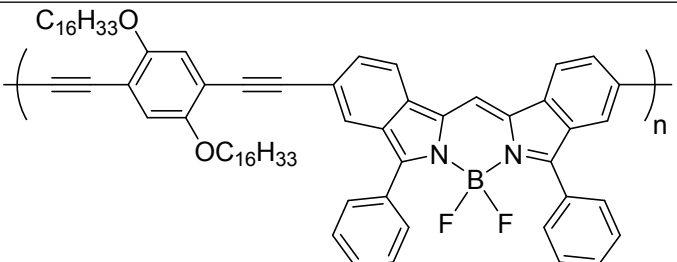   | CHCl <sub>3</sub>               | 677 | 705 | 1.42 | 0.33 | 587* | 45 |
|   | CHCl <sub>3</sub>               | 662 | 691 | 2.02 | 0.49 | 634* | 45 |
|  | CHCl <sub>3</sub>               | 694 | 720 | 2.14 | 0.38 | 520* | 45 |

|                                                                                     |                                 |     |                          |       |      |      |     |
|-------------------------------------------------------------------------------------|---------------------------------|-----|--------------------------|-------|------|------|-----|
| 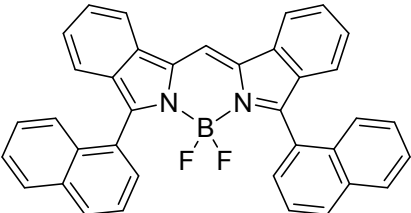   | MeOH                            | 621 | 645                      | 1.19  | 1.0  | 599* | 34a |
|    | MeOH                            | 680 | 713                      | nd    | 0.35 | 681* | 34a |
|    | MeCN                            | 690 | 737                      | 0.490 | 0.33 | 924  | 71  |
|                                                                                     | MeOH                            | 693 | 738                      | 0.589 | 0.30 | 880  | 71  |
|                                                                                     | THF                             | 698 | 742                      | 0.661 | 0.33 | 850  | 71  |
|                                                                                     | CH <sub>2</sub> Cl <sub>2</sub> | 699 | 745                      | 0.912 | 0.36 | 815  | 71  |
|                                                                                     | toluene                         | 706 | 747                      | 0.724 | 0.35 | 777  | 71  |
|   | MeOH                            | 696 | 732                      | 0.816 | 0.19 | 707* | 34a |
|  | THF                             | 705 | 674<br>(ex<br>654<br>nm) | 0.806 | 0.16 | 671  | 53  |

|                                                                                     |                                 |                    |                    |      |       |       |    |
|-------------------------------------------------------------------------------------|---------------------------------|--------------------|--------------------|------|-------|-------|----|
| 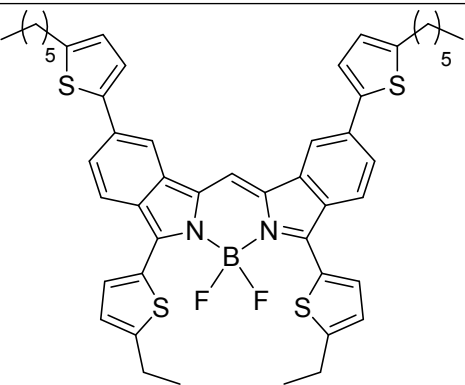   | CH <sub>2</sub> Cl <sub>2</sub> | 729                | 765                | 1.03 | 0.24  | 654   | 62 |
|    | THF                             | 735                | 769<br>(ex 654 nm) | 1.12 | 0.11  | 602   | 53 |
|                                                                                     | hexane                          | 733                | 763<br>(ex 654 nm) | 1.23 | 0.088 | 536   | 53 |
|                                                                                     | DMF                             | 738                | 773<br>(ex 654 nm) | 1.03 | 0.069 | 614   | 53 |
|  | THF                             | 737                | 767<br>(ex 303 nm) | 1.29 | 0.024 | 20000 | 53 |
|                                                                                     |                                 | 767<br>(ex 654 nm) | 0.089              | 531  | 53    |       |    |

|                                                                                     |     |     |                          |      |       |       |    |
|-------------------------------------------------------------------------------------|-----|-----|--------------------------|------|-------|-------|----|
| 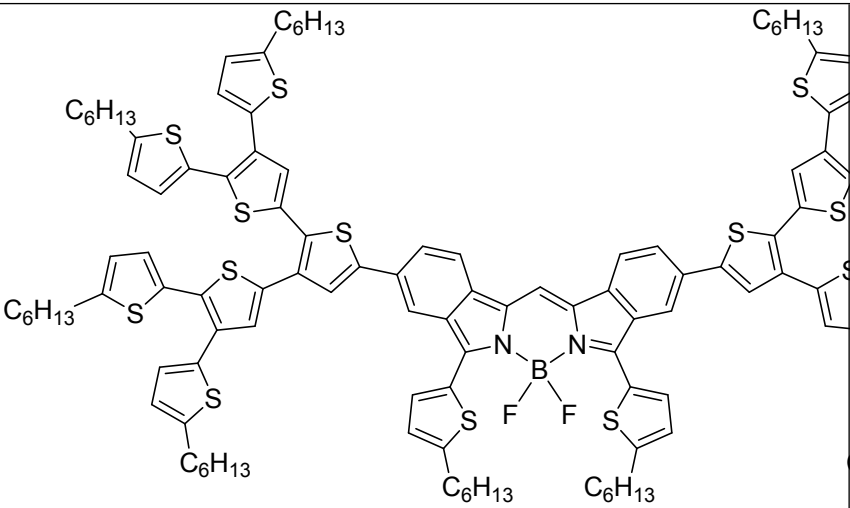  | THF | 737 | 767<br>(ex<br>303<br>nm) | 1.31 | 0.024 | 20000 | 53 |
|                                                                                     |     |     | 767<br>(ex<br>654<br>nm) |      | 0.099 | 531   | 53 |
|  | THF | 737 | 767<br>(ex<br>303<br>nm) | 1.41 | 0.023 | 20000 | 53 |
|                                                                                     |     |     | 767<br>(ex<br>654<br>nm) |      | 0.12  | 531   | 53 |



|                                                                                    |                                 |     |     |       |      |       |     |
|------------------------------------------------------------------------------------|---------------------------------|-----|-----|-------|------|-------|-----|
| 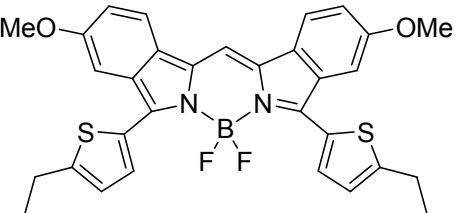  | CH <sub>2</sub> Cl <sub>2</sub> | 727 | 780 | 0.90  | 0.20 | 930   | 38  |
|   | CH <sub>2</sub> Cl <sub>2</sub> | 727 | 780 | 1.00  | 0.20 | 934   | 39  |
|   | CH <sub>2</sub> Cl <sub>2</sub> | 732 | 780 | 0.778 | 0.16 | 840   | 48  |
|   | CH <sub>2</sub> Cl <sub>2</sub> | 765 | 827 | 0.668 |      | 980*  | 34b |
|  | CH <sub>2</sub> Cl <sub>2</sub> | 766 | 831 | 0.654 |      | 1021* | 34b |

|                                                                                     |                                 |     |     |      |      |      |    |
|-------------------------------------------------------------------------------------|---------------------------------|-----|-----|------|------|------|----|
| 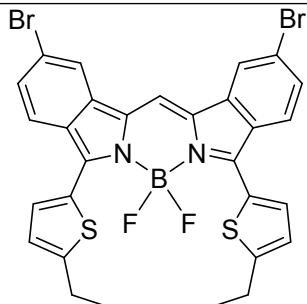   | CH <sub>2</sub> Cl <sub>2</sub> | 700 | 741 | 0.88 | 0.41 | 790  | 62 |
|    | toluene                         | 723 | 763 | 0.92 | 0.28 | 725  | 62 |
|                                                                                     | CH <sub>2</sub> Cl <sub>2</sub> | 723 | 774 | 0.80 | 0.22 | 912  |    |
|                                                                                     | acetone                         | 719 | 766 | 0.68 | 0.17 | 989  |    |
|                                                                                     | acetone + H <sup>+</sup>        | 700 | 738 | 0.69 | 0.24 | 735  |    |
|   | toluene                         | 710 | 754 | 0.88 | 0.27 | 821  | 62 |
|                                                                                     | CH <sub>2</sub> Cl <sub>2</sub> | 708 | 759 | 0.80 | 0.19 | 949  |    |
|                                                                                     | acetone                         | 699 | 753 | 0.84 | 0.14 | 1025 |    |
|                                                                                     | acetone + H <sup>+</sup>        | 686 | 721 | 0.86 | 0.22 | 707  |    |
|  | toluene                         | 716 | 758 | 0.86 | 0.29 | 773  | 62 |

|                                                                                    |                                 |     |     |       |      |      |     |
|------------------------------------------------------------------------------------|---------------------------------|-----|-----|-------|------|------|-----|
|                                                                                    | CH <sub>2</sub> Cl <sub>2</sub> | 714 | 765 | 0.75  | 0.23 | 933  |     |
|                                                                                    | acetone                         | 708 | 761 | 0.74  | 0.18 | 983  |     |
|                                                                                    | acetone + H <sup>+</sup>        | 684 | 712 | 0.72  | 0.22 | 574  |     |
| 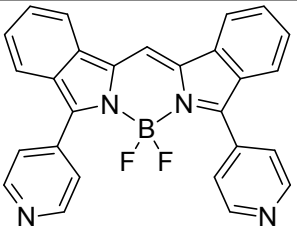  | MeOH                            | 644 | 671 | 0.96  | 0.78 | 625* | 34a |
|   | CH <sub>2</sub> Cl <sub>2</sub> | 631 | 664 | 1.023 | 0.93 | 788* | 30  |
|                                                                                    | THF                             | 631 | 651 | 0.603 | 0.64 | 487  | 58  |
|  | THF                             | 651 | 683 | 0.525 | 0.23 | 720  | 58  |

|                                                                                    |     |     |     |       |      |     |    |
|------------------------------------------------------------------------------------|-----|-----|-----|-------|------|-----|----|
| 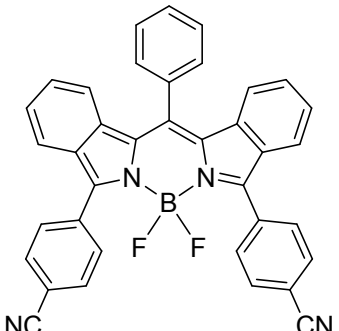  | THF | 643 | 670 | 0.589 | 0.48 | 627 | 58 |
|   | THF | 635 | 656 | 0.617 | 0.67 | 504 | 58 |
|  | THF | 641 | 667 | 0.871 | 0.48 | 608 | 58 |

|                                                                                    |                                 |     |     |       |      |      |    |
|------------------------------------------------------------------------------------|---------------------------------|-----|-----|-------|------|------|----|
| 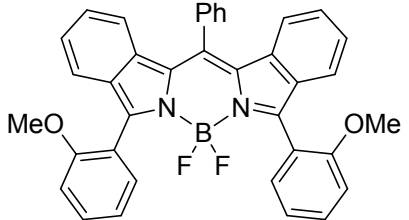  | CH <sub>2</sub> Cl <sub>2</sub> | 617 | 652 | 1.023 | 0.91 | 870* | 30 |
|   | THF                             | 638 | 664 | 0.871 | 0.55 | 614  | 58 |
|  | THF                             | 642 | 667 | 0.977 | 0.46 | 584  | 58 |

|                                                                                     |                                 |          |          |              |            |            |    |
|-------------------------------------------------------------------------------------|---------------------------------|----------|----------|--------------|------------|------------|----|
| 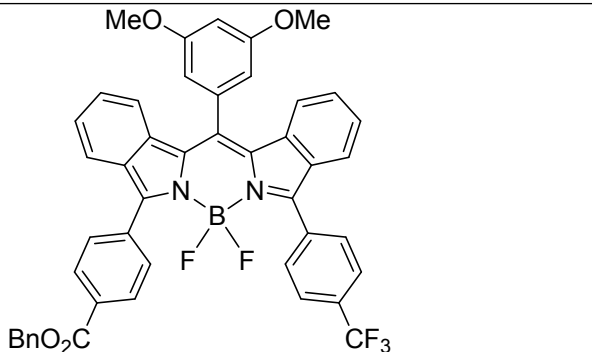  | THF                             | 638      | 663      | 0.776        | 0.55       | 591        | 58 |
| <b>B,C-chelate DIISOINDOLE-BODIPY</b>                                               |                                 |          |          |              |            |            |    |
|   | CH <sub>2</sub> Cl <sub>2</sub> | 641      | 697      | 0.912        | 0.43       | 1250       | 48 |
|  | CH <sub>2</sub> Cl <sub>2</sub> | 370, 614 | 643, 643 | 0.42, 0.783  | 0.64, 0.65 | 11475, 734 | 39 |
|                                                                                     | CH <sub>2</sub> Cl <sub>2</sub> | 370, 612 | /, 643   | 0.467, 0.941 | 0.70, 0.71 | 11475, 788 | 48 |

|                                                                                    |                                 |          |        |              |            |              |    |
|------------------------------------------------------------------------------------|---------------------------------|----------|--------|--------------|------------|--------------|----|
| 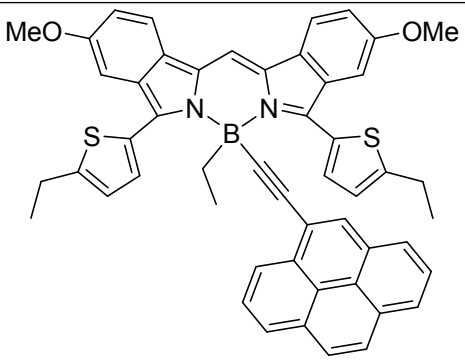  | CH <sub>2</sub> Cl <sub>2</sub> | 371, 680 | /, 737 | 0.70, 0.78   | 0.20, 0.26 | 13386, 11370 | 48 |
|   | CH <sub>2</sub> Cl <sub>2</sub> | 632      | 656    | 0.825        | 0.57       | 579          | 39 |
|                                                                                    | CH <sub>2</sub> Cl <sub>2</sub> | 632      | 656    | 0.825        | 0.60       | 479          | 48 |
|  | CH <sub>2</sub> Cl <sub>2</sub> | 368, 634 | /, 658 | 0.526, 0.829 | 0.61, 0.62 | 11976, 575   | 48 |

|                                                                                     |                                 |          |        |              |            |            |    |
|-------------------------------------------------------------------------------------|---------------------------------|----------|--------|--------------|------------|------------|----|
| 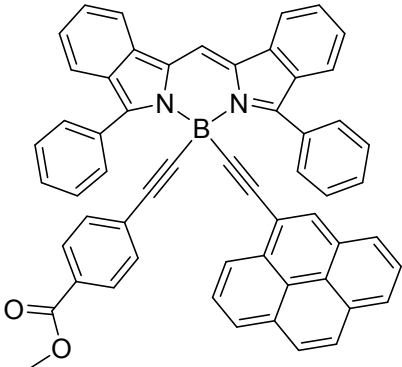   | CH <sub>2</sub> Cl <sub>2</sub> | 368, 634 | /, 660 | 0.551, 0.923 | 0.64, 0.65 | 12000, 621 | 48 |
|   | CH <sub>2</sub> Cl <sub>2</sub> | 643      | 672    | 0.75         | 0.66       | 671*       | 47 |
|  | CH <sub>2</sub> Cl <sub>2</sub> | 666      | 700    | 0.85         | 0.58       | 729        | 39 |



|                                                                                    |                                 |          |          |              |            |            |    |
|------------------------------------------------------------------------------------|---------------------------------|----------|----------|--------------|------------|------------|----|
|                                                                                    | CH <sub>2</sub> Cl <sub>2</sub> | 668      | 700      | 0.761        | 0.49       | 684        | 48 |
| 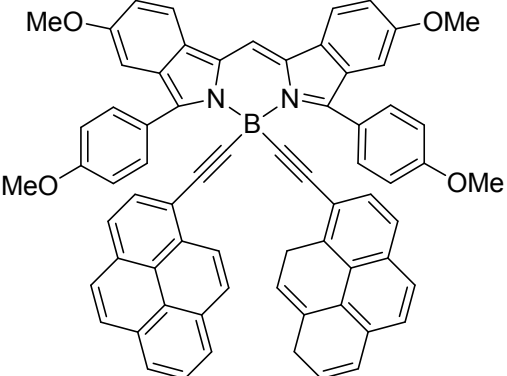  | CH <sub>2</sub> Cl <sub>2</sub> | 370, 667 | 702, 702 | 1.11, 0.885  | 0.32, 0.56 | 12780, 748 | 39 |
|                                                                                    | CH <sub>2</sub> Cl <sub>2</sub> | 370, 669 | /, 695   | 1.02, 0.845  | 0.52, 0.52 | 12638, 560 | 48 |
|  | CH <sub>2</sub> Cl <sub>2</sub> | 368, 671 | /, 701   | 0.732, 0.898 | 0.57, 0.57 | 12910, 638 | 48 |

|                                                                                    |                                 |          |        |             |            |            |    |
|------------------------------------------------------------------------------------|---------------------------------|----------|--------|-------------|------------|------------|----|
| 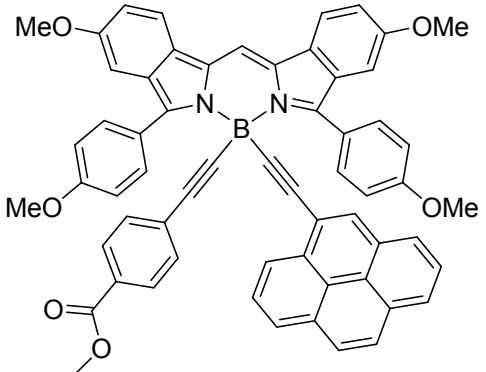  | CH <sub>2</sub> Cl <sub>2</sub> | 368, 669 | /, 701 | 0.54, 0.758 | 0.49, 0.50 | 12910, 682 | 48 |
|   | CH <sub>2</sub> Cl <sub>2</sub> | 709      | 750    | 0.86        | 0.42       | 771        | 38 |
|                                                                                    | CH <sub>2</sub> Cl <sub>2</sub> | 707      | 746    | 0.90        | 0.36       | 740        | 39 |
|                                                                                    | CH <sub>2</sub> Cl <sub>2</sub> | 707      | 746    | 0.85        | 0.29       | 740        | 48 |
|  | CH <sub>2</sub> Cl <sub>2</sub> | 709      | 750    | 0.84        | 0.45       | 771        | 38 |

|                                                                                     |                                 |          |          |             |            |            |    |
|-------------------------------------------------------------------------------------|---------------------------------|----------|----------|-------------|------------|------------|----|
| 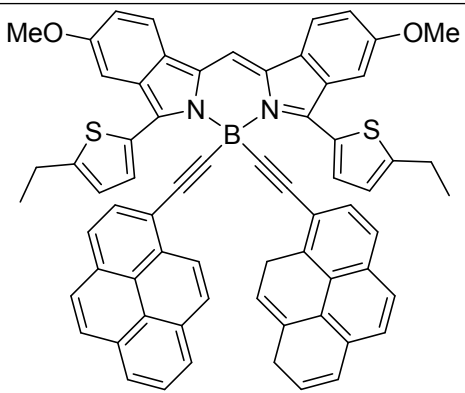   | CH <sub>2</sub> Cl <sub>2</sub> | 371, 720 | 758, 754 | 1.40, 0.90  | 0.24, 0.33 | 13762, 626 | 39 |
|                                                                                     | CH <sub>2</sub> Cl <sub>2</sub> | 370, 720 | /, 756   | 1.17, 0.781 | 0.21, 0.21 | 13800, 660 | 48 |
|    | CH <sub>2</sub> Cl <sub>2</sub> | 464, 720 | 755, 755 | 1.17, 0.82  | 0.15, 0.24 | 8307, 644  | 48 |
|  | CH <sub>2</sub> Cl <sub>2</sub> | 324, 709 | /, 750   | 1.10, 0.82  | 0.16, 0.22 | 17530, 771 | 48 |

|                                                                                                                                                                                                                                                                                                                                                                                                                                              |                                 |     |     |      |      |      |    |
|----------------------------------------------------------------------------------------------------------------------------------------------------------------------------------------------------------------------------------------------------------------------------------------------------------------------------------------------------------------------------------------------------------------------------------------------|---------------------------------|-----|-----|------|------|------|----|
| 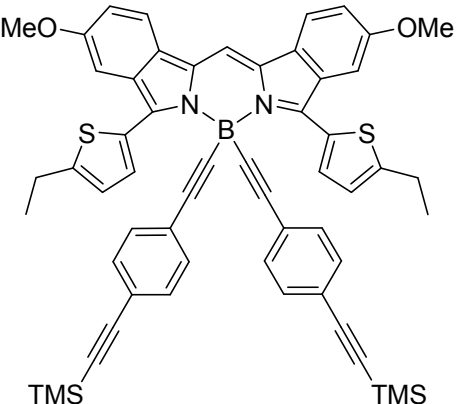 <p>The structure shows a central boron atom coordinated to two nitrogen atoms of a porphyrin-like ring system. The ring has two methoxy (MeO) groups. The boron atom is also coordinated to two alkyne groups, each protected with a trimethylsilyl (TMS) group. The alkyne chains are connected to the boron via triple bonds.</p>                        | CH <sub>2</sub> Cl <sub>2</sub> | 707 | 750 | 0.81 | 0.43 | 790  | 38 |
|  <p>The structure is similar to the one above, but the alkyne chains are terminated with hydroxy-terminated alkyne groups. Each alkyne chain consists of a triple bond connected to a phenyl ring, which is further connected to another triple bond, and finally to a carbon atom that is part of a vinyl alcohol derivative (HO-C=C-CH<sub>3</sub>).</p> | CH <sub>2</sub> Cl <sub>2</sub> | 709 | 749 | 0.88 | 0.50 | 753* | 47 |

|                                                                                                                                                                                                                                                                                                                                                                                                                                                               |                                 |          |          |            |            |            |    |
|---------------------------------------------------------------------------------------------------------------------------------------------------------------------------------------------------------------------------------------------------------------------------------------------------------------------------------------------------------------------------------------------------------------------------------------------------------------|---------------------------------|----------|----------|------------|------------|------------|----|
| 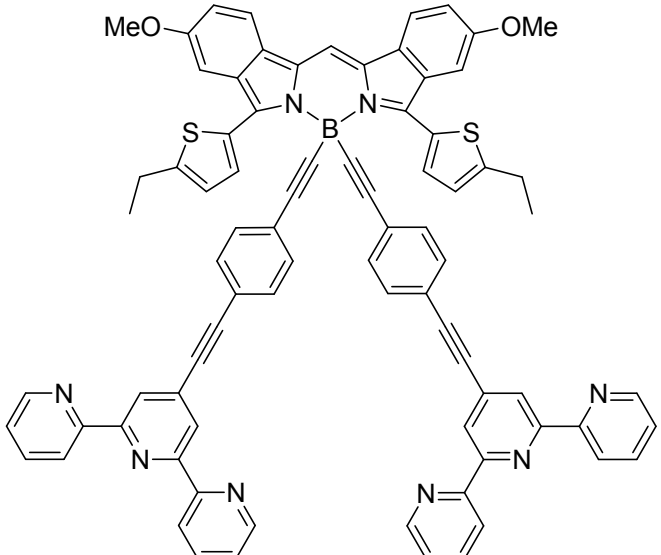 <p>The structure shows a central boron atom coordinated to two nitrogen atoms of a porphyrin-like macrocycle. The meso positions of the porphyrin are substituted with 4-methoxyphenyl groups. Two ethylthiophene groups are also coordinated to the boron. Two phenylacetylene ligands are coordinated to the boron, each further substituted with two pyridine rings.</p> | CH <sub>2</sub> Cl <sub>2</sub> | 335, 709 | 750, 750 | 1.30, 0.86 | 0.08, 0.22 | 16500, 771 | 38 |
|  <p>The structure is identical to the one above, showing a central boron atom coordinated to two nitrogen atoms of a porphyrin-like macrocycle with 4-methoxyphenyl meso-substituents, two ethylthiophene groups, and two bis(pyridine)phenylacetylene ligands.</p>                                                                                                         | CH <sub>2</sub> Cl <sub>2</sub> | 335, 708 | 750, 750 | 1.23, 0.80 | 0.09, 0.21 | 16600, 790 | 38 |

|                                                                                    |                                 |          |          |            |            |            |    |
|------------------------------------------------------------------------------------|---------------------------------|----------|----------|------------|------------|------------|----|
| 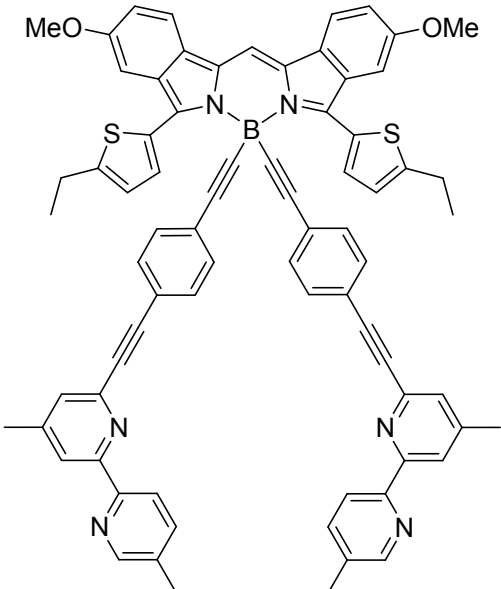  | CH <sub>2</sub> Cl <sub>2</sub> | 342, 708 | 750, 750 | 0.95, 0.81 | 0.09, 0.19 | 16000, 790 | 38 |
|  | CH <sub>2</sub> Cl <sub>2</sub> | 399, 708 | 750, 750 | 1.35, 0.83 | 0.23, 0.40 | 11800, 790 | 38 |

|                                                                                    |                                 |               |               |                  |                  |                   |    |
|------------------------------------------------------------------------------------|---------------------------------|---------------|---------------|------------------|------------------|-------------------|----|
| 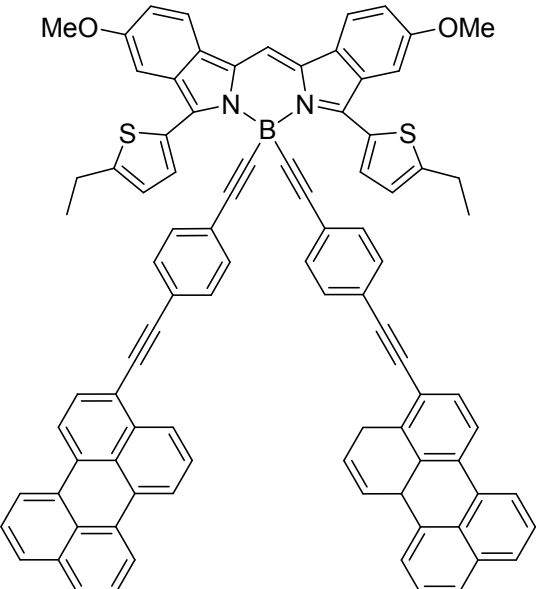  | CH <sub>2</sub> Cl <sub>2</sub> | 474, 708      | 750, 750      | 1.22, 0.84       | 0.15, 0.40       | 7800, 790         | 38 |
|  | CH <sub>2</sub> Cl <sub>2</sub> | 344, 399, 708 | 750, 750, 750 | 0.76, 0.71, 0.80 | 0.15, 0.18, 0.34 | 15700, 11800, 790 | 38 |

|                                                                                    |                                 |          |        |             |            |            |    |
|------------------------------------------------------------------------------------|---------------------------------|----------|--------|-------------|------------|------------|----|
| 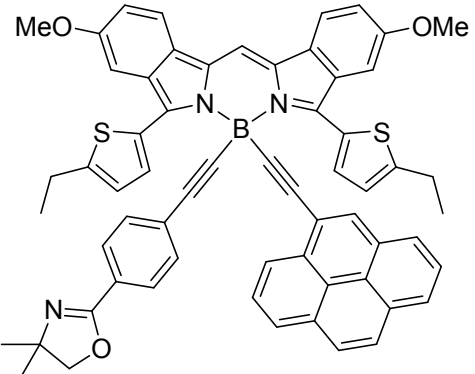  | CH <sub>2</sub> Cl <sub>2</sub> | 371, 717 | /, 753 | 0.76, 0.79  | 0.24, 0.24 | 13700, 631 | 48 |
|   | CH <sub>2</sub> Cl <sub>2</sub> | 371, 716 | /, 751 | 0.79, 0.83  | 0.17, 0.19 | 13700; 650 | 48 |
|  | CH <sub>2</sub> Cl <sub>2</sub> | 371, 713 | /, 750 | 1.015, 0.84 | 0.21, 0.24 | 13600, 692 | 48 |



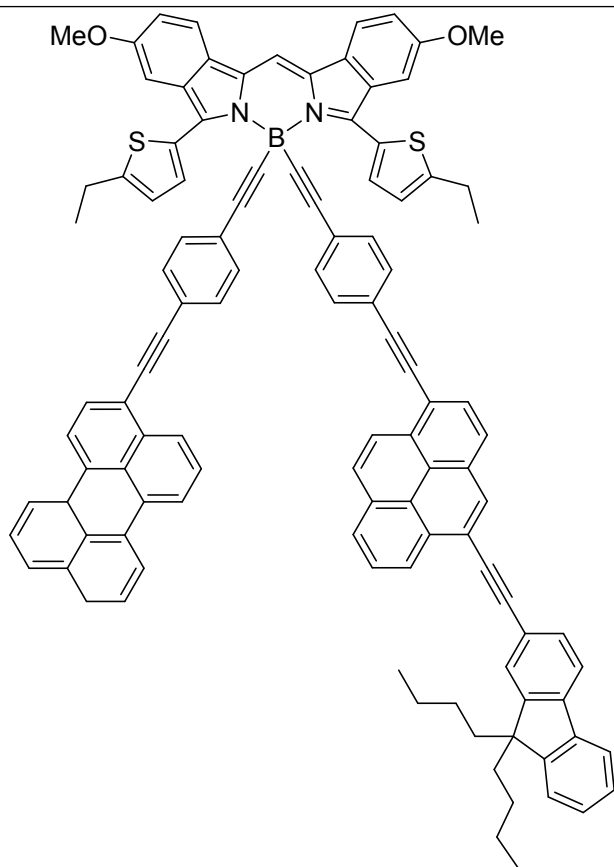

CH<sub>2</sub>Cl<sub>2</sub>

708

750

0.78

0.46

791\*

40

**B,O-chelate DIISOINDOLE-BODIPYs**

|                                                                                     |                                 |     |     |       |      |      |    |
|-------------------------------------------------------------------------------------|---------------------------------|-----|-----|-------|------|------|----|
| 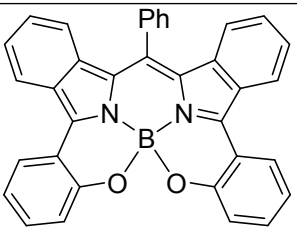   | CH <sub>2</sub> Cl <sub>2</sub> | 711 | 733 | 0.912 | 0.58 | 422* | 30 |
|    | THF                             | 746 |     | 0.829 |      |      | 32 |
|    | THF                             | 748 |     | 0.834 |      |      | 32 |
|   | THF                             | 733 |     | 1.35  |      |      | 49 |
|  | THF                             | 747 |     | 1.48  |      |      | 49 |

### B,O,C-chelate ISOINDOLE-BODIPYS

|                                                                                     |                                 |     |     |       |      |     |    |
|-------------------------------------------------------------------------------------|---------------------------------|-----|-----|-------|------|-----|----|
| 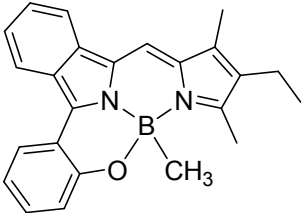   | hexane                          | 621 | 632 | 0.772 | 0.78 | 268 | 72 |
|                                                                                     | toluene                         | 625 | 636 | 0.690 | 0.71 | 290 |    |
|                                                                                     | CH <sub>2</sub> Cl <sub>2</sub> | 622 | 635 | 0.626 | 0.76 | 317 |    |
|                                                                                     | MeCN                            | 616 | 630 | 0.599 | 0.75 | 348 |    |
|    | hexane                          | 625 | 636 | 0.863 | 0.77 | 277 | 72 |
|                                                                                     | toluene                         | 629 | 64  | 0.793 | 0.64 | 286 |    |
|                                                                                     | CH <sub>2</sub> Cl <sub>2</sub> | 627 | 638 | 0.748 | 0.75 | 275 |    |
|                                                                                     | MeCN                            | 621 | 634 | 0.733 | 0.75 | 330 |    |
|   | hexane                          | 625 | 635 | 0.688 | 0.71 | 252 | 72 |
|                                                                                     | toluene                         | 629 | 641 | 0.650 | 0.68 | 285 |    |
|                                                                                     | CH <sub>2</sub> Cl <sub>2</sub> | 627 | 639 | 0.646 | 0.70 | 312 |    |
|                                                                                     | MeCN                            | 621 | 634 | 0.689 | 0.67 | 318 |    |
|  | hexane                          | 625 | 636 | 0.745 | 0.78 | 277 | 72 |
|                                                                                     | toluene                         | 629 | 639 | 0.649 | 0.70 | 261 |    |
|                                                                                     | CH <sub>2</sub> Cl <sub>2</sub> | 627 | 639 | 0.624 | 0.70 | 287 |    |
|                                                                                     | MeCN                            | 621 | 633 | 0.558 | 0.73 | 306 |    |

|                                                                                     |                                 |     |     |       |      |     |    |
|-------------------------------------------------------------------------------------|---------------------------------|-----|-----|-------|------|-----|----|
| 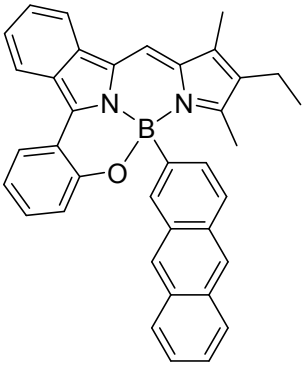   | hexane                          | 626 | 636 | 0.801 | 0.75 | 264 | 72 |
|                                                                                     | toluene                         | 630 | 641 | 0.740 | 0.68 | 273 |    |
|                                                                                     | CH <sub>2</sub> Cl <sub>2</sub> | 627 | 639 | 0.662 | 0.76 | 300 |    |
|                                                                                     | MeCN                            | 621 | 635 | 0.659 | 0.66 | 343 |    |
|    | hexane                          | 627 | 638 | 0.728 | 0.72 | 275 | 72 |
|                                                                                     | toluene                         | 630 | 642 | 0.663 | 0.66 | 197 |    |
|                                                                                     | CH <sub>2</sub> Cl <sub>2</sub> | 628 | 640 | 0.66  | 0.71 | 299 |    |
|                                                                                     | MeCN                            | 622 | 635 | 0.582 | 0.66 | 342 |    |
|   | hexane                          | 698 | 711 | 0.677 | 0.36 | 262 | 72 |
|                                                                                     | toluene                         | 703 | 720 | 0.624 | 0.35 | 336 |    |
|                                                                                     | CH <sub>2</sub> Cl <sub>2</sub> | 699 | 717 | 0.554 | 0.35 | 359 |    |
|                                                                                     | MeCN                            | 690 | 712 | 0.565 | 0.37 | 448 |    |
|  | MeOH                            | 621 | 637 | 0.825 | 0.58 | 401 | 72 |

|                                                                                     |                                 |     |     |       |                     |      |    |
|-------------------------------------------------------------------------------------|---------------------------------|-----|-----|-------|---------------------|------|----|
|                                                                                     | DMSO                            | 626 | 642 | 0.716 | 0.63                | 398  |    |
| 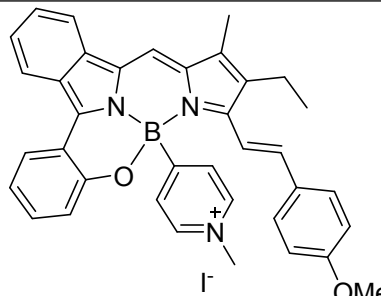   | MeOH                            | 695 | 717 | 0.470 | 0.21                | 441  | 72 |
|                                                                                     | DMSO                            | 703 | 727 | 0.447 | 0.26                | 470  |    |
| <b>HIGHLY CONJUGATED BODIPYs</b>                                                    |                                 |     |     |       |                     |      |    |
|   | CH <sub>2</sub> Cl <sub>2</sub> | 629 | 652 | 0.776 | 0.70<br>(ex 586 nm) | 561* | 29 |
|  | CH <sub>2</sub> Cl <sub>2</sub> | 658 | 695 | 0.794 | 0.70<br>(ex 610 nm) | 809* | 29 |

|                                                                                     |                                 |                                 |     |       |                     |      |      |    |
|-------------------------------------------------------------------------------------|---------------------------------|---------------------------------|-----|-------|---------------------|------|------|----|
| 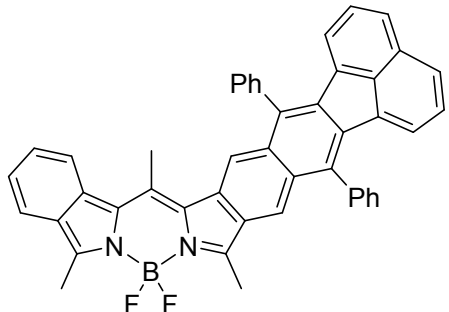   | CH <sub>2</sub> Cl <sub>2</sub> | 681                             | 697 | 0.912 | 0.36<br>(ex 627 nm) | 337* | 29   |    |
|    | CH <sub>2</sub> Cl <sub>2</sub> | 761                             | 777 | 1.66  | 0.35<br>(ex 695 nm) | 271* | 29   |    |
|   | CH <sub>2</sub> Cl <sub>2</sub> | 765                             | 783 | 1.995 | 0.32<br>(ex 700 nm) | 301* | 29   |    |
|  | R = H                           | CH <sub>2</sub> Cl <sub>2</sub> | 600 | 608   | 1.07                | 1.0  | 219* | 21 |
|                                                                                     | R = Me                          | CH <sub>2</sub> Cl <sub>2</sub> | 600 | 612   | 1.52                | 0.8  | 327* |    |

|                                                                                     |       |                                 |     |     |      |     |      |    |
|-------------------------------------------------------------------------------------|-------|---------------------------------|-----|-----|------|-----|------|----|
|                                                                                     | R = F | CH <sub>2</sub> Cl <sub>2</sub> | 602 | 612 | 1.40 | 1.0 |      |    |
| 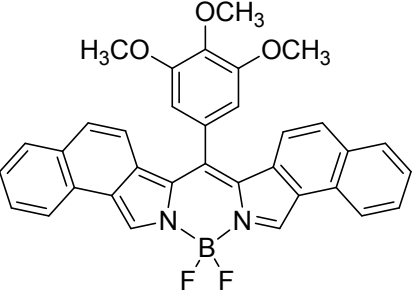   |       | CH <sub>2</sub> Cl <sub>2</sub> | 596 | 604 | 1.58 | 0.9 | 222* | 21 |
|    |       | CH <sub>2</sub> Cl <sub>2</sub> | 603 | 612 | 1.76 | 1.0 | 244* | 21 |
|   |       | CH <sub>2</sub> Cl <sub>2</sub> | 612 | 619 | 1.94 | 0.5 | 185* | 21 |
|  |       | CH <sub>2</sub> Cl <sub>2</sub> | 599 | 613 | 1.38 | 1.0 | 381* | 22 |

|                                                                                     |                   |     |     |      |      |      |           |
|-------------------------------------------------------------------------------------|-------------------|-----|-----|------|------|------|-----------|
| 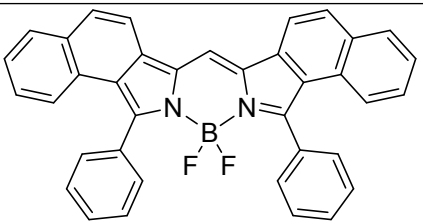   | MeOH              | 605 | 616 | 2.49 | 1.0  | 295* | 34a       |
|    | MeOH              | 609 | 630 | 1.84 | 0.86 | 547* | 34a       |
|    | MeOH              | 653 | 670 | nd   | 0.34 | 389* | 34a       |
|   | hexane            | 630 | 647 |      | 0.94 | 417* | 18,<br>20 |
|                                                                                     | Bu <sub>2</sub> O | 630 | 648 |      | ~1   | 441* |           |
|                                                                                     | Et <sub>2</sub> O | 627 | 647 |      | ~1   | 493* |           |
|                                                                                     | THF               | 630 | 650 |      | 0.96 | 488* |           |
|                                                                                     | acetone           | 626 | 647 |      | 0.97 | 518* |           |
|                                                                                     | MeCN              | 625 | 647 | 1.17 | 0.95 | 544* |           |
|                                                                                     | MeOH              | 626 | 647 |      | 0.81 | 518* |           |
|  | hexane            | 633 | 652 |      | 0.98 | 460* | 18,<br>20 |
|                                                                                     | Bu <sub>2</sub> O | 633 | 654 |      | 0.92 | 507* |           |
|                                                                                     | Et <sub>2</sub> O | 630 | 652 |      | 0.92 | 535* |           |



|                                                                                    |                   |     |     |       |       |      |           |
|------------------------------------------------------------------------------------|-------------------|-----|-----|-------|-------|------|-----------|
|                                                                                    | THF               | 633 | 656 |       | 0.90  | 554* |           |
|                                                                                    | acetone           | 630 | 652 |       | 0.89  | 536* |           |
|                                                                                    | MeCN              | 628 | 652 | 0.977 | 0.88  | 586* |           |
|                                                                                    | MeOH              | 629 | 652 |       | 0.76s | 651* |           |
| 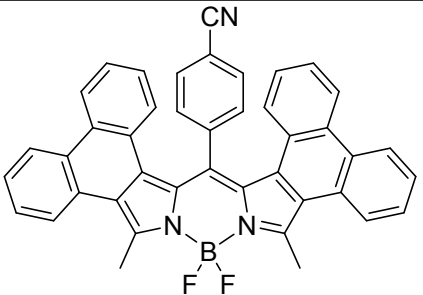  | hexane            | 642 | 667 |       | 0.90  | 584* | 18,<br>20 |
|                                                                                    | Bu <sub>2</sub> O | 642 | 668 |       | 0.95  | 606* |           |
|                                                                                    | Et <sub>2</sub> O | 639 | 666 |       | 0.95  | 634* |           |
|                                                                                    | THF               | 642 | 670 |       | 0.89  | 651* |           |
|                                                                                    | acetone           | 638 | 667 |       | 0.86  | 681* |           |
|                                                                                    | MeCN              | 637 | 666 | 0.955 | 0.80  | 683* |           |
|                                                                                    | MeOH              | 638 | 667 |       | 0.73  | 681* |           |
|   | hexane            | 621 | 634 |       | ~1    | 330* | 18,<br>20 |
|                                                                                    | Bu <sub>2</sub> O | 621 | 636 |       | 0.96  | 380* |           |
|                                                                                    | Et <sub>2</sub> O | 618 | 634 |       | 0.94  | 408* |           |
|                                                                                    | THF               | 621 | 637 |       | 0.30  | 404* |           |
|                                                                                    | acetone           | 618 | 631 |       | 0.033 | 333* |           |
|                                                                                    | MeCN              | 617 | 626 | 1.15  | 0.023 | 233* |           |
|                                                                                    | MeOH              | 617 | 629 |       | 0.060 | 309* |           |
|  | hexane            | 626 | 640 |       | 0.96  | 349* | 18,<br>20 |
|                                                                                    | Bu <sub>2</sub> O | 626 | 642 |       | ~1    | 398* |           |
|                                                                                    | Et <sub>2</sub> O | 623 | 641 |       | ~1    | 451* |           |
|                                                                                    | THF               | 626 | 644 |       | 0.98  | 446* |           |
|                                                                                    | acetone           | 623 | 642 |       | 0.96  | 475* |           |
|                                                                                    | MeCN              | 623 | 643 | 1.05  | 0.96  | 499* |           |
|                                                                                    | MeOH              | 624 | 643 |       | 0.84  | 474* |           |

|                                                                                    |                                 |     |                          |      |      |      |    |
|------------------------------------------------------------------------------------|---------------------------------|-----|--------------------------|------|------|------|----|
| 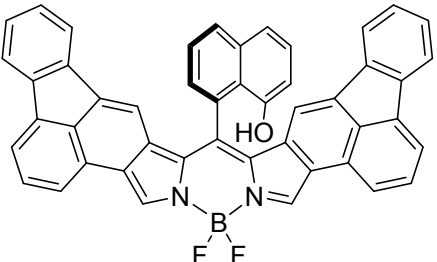  | CH <sub>2</sub> Cl <sub>2</sub> | 642 | 654                      | 1.10 | 0.8  | 286* | 22 |
|   | CH <sub>2</sub> Cl <sub>2</sub> | 645 | 657                      | 1.24 | 0.8  | 283* | 22 |
|  | THF                             | 761 | 782                      | 1.08 | 0.16 | 353  | 55 |
|                                                                                    | C <sub>6</sub> H <sub>6</sub>   | 765 | 785                      | 1.13 | 0.21 | 333  |    |
|                                                                                    | CH <sub>2</sub> Cl <sub>2</sub> | 762 | 785                      | 1.17 | 0.16 | 385  |    |
|                                                                                    | DMF                             | 764 | 788<br>(ex<br>720<br>nm) | 1.00 | 0.14 | 399  |    |

|                                                                                     |                                 |     |                          |       |        |      |    |
|-------------------------------------------------------------------------------------|---------------------------------|-----|--------------------------|-------|--------|------|----|
| 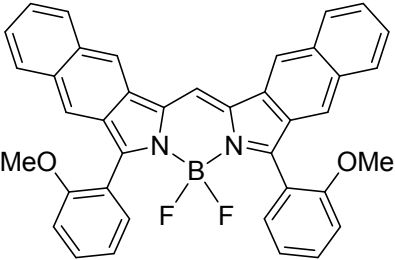   | THF                             | 738 | 760<br>(ex<br>700<br>nm) | 1.37  | 0.29   | 392  | 55 |
| <b>B,O-chelate HIGHLY CONJUGATED BODIPYs</b>                                        |                                 |     |                          |       |        |      |    |
|    | THF                             | 830 | 832<br>(ex<br>720<br>nm) | 0.962 | 0.0013 | 29   | 55 |
| <b>DIISOINDOLE-AZA-BODIPYs</b>                                                      |                                 |     |                          |       |        |      |    |
|  | CHCl <sub>3</sub>               | 715 | 736                      | 0.871 | 0.15   | 399* | 80 |
|                                                                                     | hexane                          | 705 | 725                      | nd    | 0.24   | 391* | 81 |
|                                                                                     | CH <sub>2</sub> Cl <sub>2</sub> | 712 | 736                      | 0.95  | 0.14   | 458* | 81 |
|                                                                                     |                                 | 715 | 748                      | 1.06  |        | 617* | 82 |
|                                                                                     | MeCN                            | 704 | 725                      | 0.51  | 0.20   | 411* | 81 |

|                                                                                     |                                 |          |     |            |      |              |    |
|-------------------------------------------------------------------------------------|---------------------------------|----------|-----|------------|------|--------------|----|
| 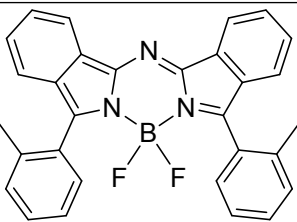   | CH <sub>2</sub> Cl <sub>2</sub> | 302, 681 | 723 | 0.10, 0.79 |      | 18428*, 853* | 82 |
|    | CH <sub>2</sub> Cl <sub>2</sub> | 300, 693 | 734 | 0.10, 0.79 |      | 19709*, 806* | 82 |
|    | CH <sub>2</sub> Cl <sub>2</sub> | 314, 718 | 756 | 0.27, 0.94 |      | 18620*, 700* | 82 |
|   | CH <sub>2</sub> Cl <sub>2</sub> | 305, 729 | 769 | 0.26, 0.91 |      | 19069*, 714* | 82 |
|  | CHCl <sub>3</sub>               | 724      | 749 | 0.851      | 0.11 | 461*         | 80 |

|                                                                                     |                                 |          |     |            |      |              |    |
|-------------------------------------------------------------------------------------|---------------------------------|----------|-----|------------|------|--------------|----|
| 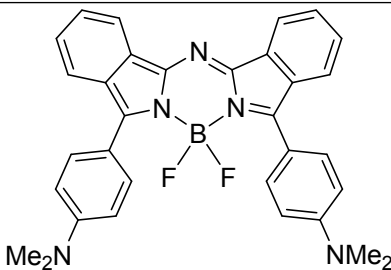   | hexane                          | 765      | 796 | nd         | 0.10 | 509*         | 81 |
|                                                                                     | CH <sub>2</sub> Cl <sub>2</sub> | 794      | 830 | 1.74       | 0.01 | 546*         |    |
|                                                                                     | MeCN                            | 789      | 833 | 0.91       | 0.01 | 669*         |    |
|    | hexane                          | 707      | 726 | nd         | 0.17 | 370*         | 81 |
|                                                                                     | CH <sub>2</sub> Cl <sub>2</sub> | 713      | 724 | 0.63       | 0.16 | 213*         |    |
|                                                                                     | MeCN                            | 702      | 726 | 0.44       | 0.19 | 471*         |    |
|   | hexane                          | 728      | 739 | nd         | 0.30 | 204*         | 81 |
|                                                                                     | CH <sub>2</sub> Cl <sub>2</sub> | 737      | 753 | 0.71       | 0.14 | 288*         |    |
|                                                                                     | MeCN                            | 729      | 745 | 0.358      | 0.20 | 295*         |    |
|  | CH <sub>2</sub> Cl <sub>2</sub> | 336, 793 | 841 | 0.29, 0.95 |      | 17871*, 720* | 82 |

(\*) The Stokes shift indicated with \* are not reported in the literature but are calculated according to the known formula:

$$\Delta_S = (1/\lambda_{\text{abs}} - 1/\lambda_{\text{em}}) (\text{cm}^{-1})$$
